# Supplementary material for: Adverse effects of rising interest rates on sustainable energy transitions
Source: Springer Nature journal article supplement (doi:10.1038/s41893-019-0375-2), 2019-09-09
Supplement: 41893_2019_375_MOESM1_ESM.pdf [file 41893_2019_375_MOESM1_ESM.pdf]

In the format provided by the authors and unedited.

# Adverse effects of rising interest rates on sustainable energy transitions

Tobias S. Schmidt <sup>1\*</sup>, Bjarne Steffen <sup>1\*</sup>, Florian Egli <sup>1\*</sup>, Michael Pahle <sup>2</sup>, Oliver Tietjen <sup>2,3</sup> and Ottmar Edenhofer<sup>2,3,4</sup>

---

<sup>1</sup>Energy Politics Group, ETH Zurich, Zürich, Switzerland. <sup>2</sup>Potsdam-Institute for Climate Impact Research, Potsdam, Germany. <sup>3</sup>TU Berlin, Berlin, Germany.

<sup>4</sup>Mercator Research Institute on Global Commons and Climate Change, Berlin, Germany. \*e-mail: [tobiasschmidt@ethz.ch](mailto:tobiasschmidt@ethz.ch); [bjarne.steffen@gess.ethz.ch](mailto:bjarne.steffen@gess.ethz.ch); [florian.egli@gess.ethz.ch](mailto:florian.egli@gess.ethz.ch)

Supplementary Materials for

# Adverse effects of rising interest rates on sustainable energy transitions

Tobias S. Schmidt<sup>1\*</sup>, Bjarne Steffen<sup>1\*</sup>, Florian Egli<sup>1\*</sup>, Michael Pahle<sup>2</sup>, Oliver Tietjen<sup>2,4</sup>, Ottmar Edenhofer<sup>2,3,4</sup>

<sup>1</sup> Energy Politics Group, ETH Zurich

<sup>2</sup> Potsdam Institute for Climate Impact Research

<sup>3</sup> Mercator Research Institute on Global Commons and Climate Change

<sup>4</sup> TU Berlin

\* [tobiasschmidt@ethz.ch](mailto:tobiasschmidt@ethz.ch) \* [bjarne.steffen@gess.ethz.ch](mailto:bjarne.steffen@gess.ethz.ch) \* [florian.egli@gess.ethz.ch](mailto:florian.egli@gess.ethz.ch)

**Note S1:** Data and model

All input data and models used are available online in the Excel file “Data and model Schmidt et al., *Nat. Sust.* (2019)”. The file contains a “read me” sheet, explaining the content of the data and calculation sheets. Sources for input values can be found in the references of this Supplementary Information.

**Table S1:** Time-varying input parameters for the LCOE model.

| <b>Solar PV</b>                   | <b>2018</b> | <b>2019</b>     | <b>2020</b>     | <b>2021</b>     | <b>2022</b>     | <b>2023</b>     |
|-----------------------------------|-------------|-----------------|-----------------|-----------------|-----------------|-----------------|
| Investment cost<br>EUR/MW (CAPEX) | 700,000     | 672,962         | 649,490         | 630,075         | 610,476         | 593,024         |
| Cost of capital                   | 1.55%       | 1.55-<br>2.12%* | 1.55-<br>2.68%* | 1.55-<br>3.24%* | 1.55-<br>3.80%* | 1.55-<br>4.36%* |
| <b>Onshore wind</b>               | <b>2018</b> | <b>2019</b>     | <b>2020</b>     | <b>2021</b>     | <b>2022</b>     | <b>2023</b>     |
| Investment cost<br>EUR/MW (CAPEX) | 1,750,000   | 1,739,264       | 1,728,588       | 1,718,645       | 1,710,085       | 1,702,698       |
| Cost of capital                   | 1.89%       | 1.89-<br>2.46%* | 1.89-<br>3.03%* | 1.89-<br>3.61%* | 1.89-<br>4.18%* | 1.89-<br>4.75%* |

\* = depending on the interest rate scenario

**Table S2:** Constant input parameters for the LCOE model.

| <b>Variable (source)</b>                            | <b>Solar PV</b> | <b>Onshore wind</b> |
|-----------------------------------------------------|-----------------|---------------------|
| Leverage ratio <sup>6</sup>                         | 0.87            | 0.82                |
| Debt margin <sup>6</sup>                            | 1.03%           | 1.10%               |
| Equity premium <sup>6</sup>                         | 3.26%           | 3.84%               |
| Asset lifetime <sup>10</sup>                        | 25 years        | 25 years            |
| Learning rate <sup>10</sup>                         | 15%             | 5%                  |
| Full-load hours p.a. <sup>10</sup>                  | 1,105           | 2,500               |
| Operation and maintenance cost (OPEX) <sup>10</sup> | 17,500 €/MW     | 30,000 €/MW         |
| Tax rate <sup>12</sup>                              | 0.30            | 0.30                |

**Table S3:** Input parameters for the marginal cost model.

| <b>Variable (source)</b>                 | <b>Lignite plant</b> | <b>Hard coal plant</b> | <b>CCGT plant</b> | <b>unit</b>                                     |
|------------------------------------------|----------------------|------------------------|-------------------|-------------------------------------------------|
| Thermal efficiency <sup>13,14</sup>      | 0.37 – 0.43          | 0.37 – 0.46            | 0.52 – 0.62       | MWh <sub>electric</sub> /MWh <sub>thermal</sub> |
| Emission factor <sup>14</sup>            | 0.404                | 0.339                  | 0.202             | t/MWh <sub>thermal</sub>                        |
| Variable O&M cost <sup>15</sup>          | 5                    | 5                      | 4                 | EUR/MWh <sub>electric</sub>                     |
| CO2 emissions cost                       | 15.92                | 15.92                  | 15.92             | EUR/t                                           |
| Fuel cost in flat scenario <sup>15</sup> | 1.8                  | 11.34                  | 26.3              | EUR/MWh <sub>thermal</sub>                      |

## References

1. OECD. Main Economic Indicators - complete database. *Main Economic Indicators (database)* (2016). doi:<http://dx.doi.org/10.1787/data-00052-en>
2. Gorton, G. & Metrick, A. Getting Up to Speed on the Financial Crisis: A One-Weekend-Reader's Guide. *J. Econ. Lit.* **50**, 128–150 (2012).
3. Deka. *Macro Research Economic Forecasts*. (2018).
4. Commerzbank Economic Research. *Commerzbank forecasts*. (2018).
5. Swiss Re Institute. *Global Economic Outlook*. (2018).
6. Egli, F., Steffen, B. & Schmidt, T. S. A dynamic analysis of financing conditions for renewable energy technologies. *Nat. Energy* **3**, 1084–1092 (2018).
7. Donovan, C. & Nuñez, L. Figuring what's fair: The cost of equity capital for renewable energy in emerging markets. *Energy Policy* **40**, 49–58 (2012).
8. IRENA. Renewable capacity statistics 2017. (2017).
9. IEA. Renewables 2018 Market analysis and forecast from 2018 to 2023. (2018).
10. Fraunhofer ISE. Stromgestehungskosten Erneuerbare Energien. (2018).
11. Rubin, E. S., Azevedo, I. M. L., Jaramillo, P. & Yeh, S. A review of learning rates for electricity supply technologies. *Energy Policy* **86**, 198–218 (2015).
12. OECD. Statutory corporate income tax rate. 2018
13. Görner, K. & Sauer, D. U. *Konventionelle Kraftwerke - Technologiesteckbrief zur Analyse „Flexibilitätskonzepte für die Stromversorgung 2050“*. *Energiesysteme der Zukunft* (2016).
14. VGB Powertech. *Levelised Cost of Electricity 2015*. (2015).
15. Kost, C., Shammugam, S., Jülich, V., Nguyen, H.-T. & Schlegel, T. Stromgestehungskosten Erneuerbare Energien. *Fraunhofer ISE* 44 (2018).
